# Supplementary material for: Molecular basis for the increased affinity of an RNA recognition motif with re-engineered specificity: A molecular dynamics and enhanced sampling simulations study
Source: PLOS journal article supplement (doi:10.1371/journal.pcbi.1006642), 2018-12-06
Supplement: S15 (10.1371/journal.pcbi.1006642.s015) [file journal.pcbi.1006642.s015]

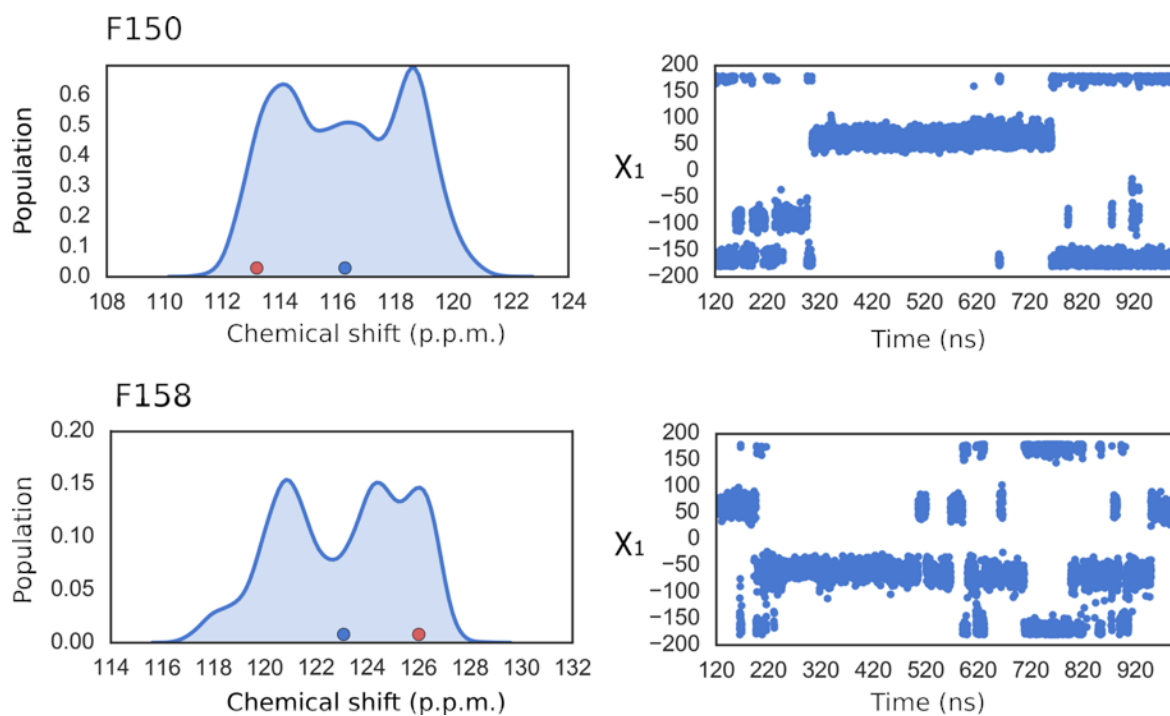

**S13 Fig.** Distributions of CS predicted by SHIFTX+ for F150 and F158  $^{15}\text{N}$  from the MD simulations of the Rbfox in complex with pre-miR20b (see Materials and Methods for details) and values of the  $\chi_1$  angles of the same residues in trajectory 9. The blue dot represents the calculated average value; the red one corresponds to the experimental value. A similar behaviour is observed in the other simulations performed on the system.
