# Supplementary material for: Molecular basis for the increased affinity of an RNA recognition motif with re-engineered specificity: A molecular dynamics and enhanced sampling simulations study
Source: PLOS journal article supplement (doi:10.1371/journal.pcbi.1006642), 2018-12-06
Supplement: S21 (10.1371/journal.pcbi.1006642.s021) [file journal.pcbi.1006642.s021]

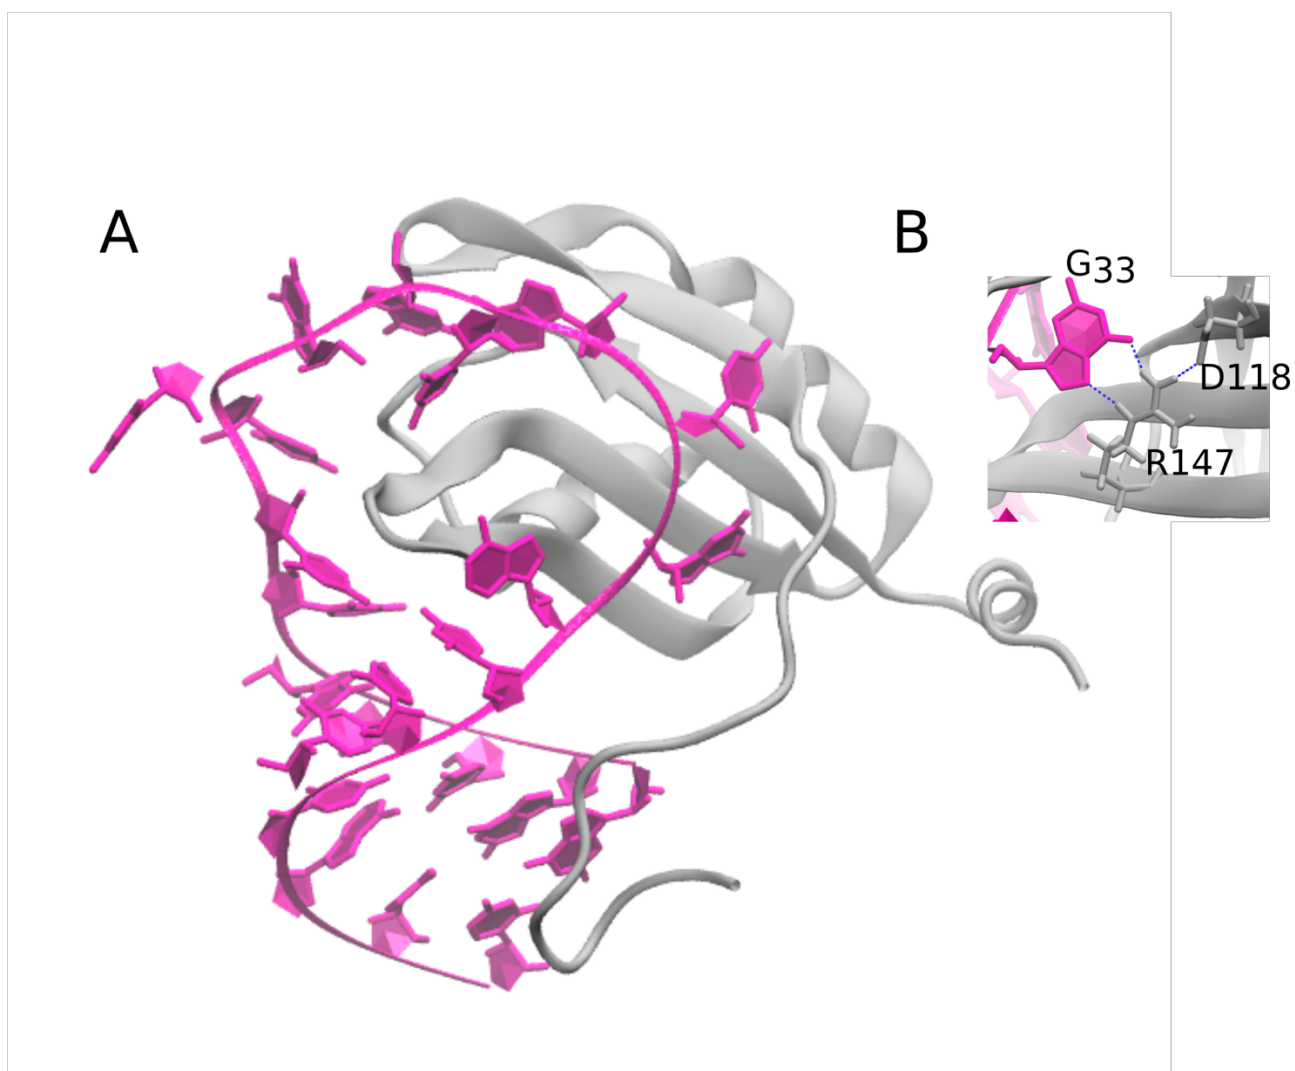

**S19 Fig. Rbfox\*•pre-miR20b complex.** (A) Top view of the structure in the simulation (Table 1, sim. 24).  
 (B) Details of the H-bond interactions (dashed blue lines) involving G<sub>33</sub>, R147 and D118.
